# Supplementary material for: Trends in disease indications for hematopoietic stem cell transplantation in the Asia-Pacific region: A report of the Activity Survey 2017 from APBMT
Source: PubMed Central journal article supplement — Blood Cell Ther. 2022 Jul 8;5(4):87–98. doi: 10.31547/bct-2022-002 (PMC9873430; doi:10.31547/bct-2022-002), 2022-07-08
Supplement: 2432-7026-5-4-0087-s001.pdf [file 2432-7026-5-4-0087-s001.pdf]

**Supplementary**

All centers contributing to the activity survey reported in this study (HSCTs performed in 2017) are listed here. Since they do not include the name of each department, the total number of centers in this appendix is slightly different from that in Table 1.

***Australia***

Alfred Hospital, Ashford Cancer Centre, Box Hill Hospital, Brisbane Private Hospital, Canberra Hospital, Concord Hospital, Fremantle Hospital, Geelong Hospital, Gosford Hospital, Greenslopes Private Hospital, John Hunter Children's Hospital, Liverpool Hospital, Mater Hospital Brisbane, Mater Private Hospital Brisbane, Nepean Hospital, Calvary Mater Hospital Newcastle, Peter MacCallum Cancer Centre, Prince of Wales Hospital, Princess Alexandra Hospital, Princess Margaret Hospital for Children, Queen Elizabeth Hospital, Royal Adelaide Hospital, Lady Cilento Children's Hospital, Royal Brisbane Hospital, Royal Children's Hospital Melbourne, Royal Hobart Hospital, Royal Melbourne Hospital, Royal North Shore Hospital, Royal Perth Hospital, Royal Prince Alfred Hospital, Sir Charles Gairdner Hospital, St George Hospital, St Vincent's Hospital Sydney, St Vincent's Hospital Melbourne, Sydney Children's Hospital, The Children's Hospital at Westmead, Townsville Hospital, Wesley Clinic, Westmead Hospital, Wollongong Hospital, Women & Children's Hospital, Austin Hospital, Flinders Medical Centre, Fiona Stanley Hospital, Gold Coast University Hospital

***Bangladesh***

Dhaka Medical College and Hospital; Combined Military Hospital; Apollo Hospitals, Dhaka

***China (mainland)***

Beijing Cancer Hospital, Beijing Chao-Yang Hospital, Ludaopei Hematology and Oncology Center, Beijing Hospital, Cancer Institute and Hospital Chinese Academy of Medical Sciences, The First Affiliated Hospital of Zhejiang University, Guangdong Province Hospital Of Traditional Chinese Medicine, The First Affiliated Hospital of China PLA General Hospital, Hainan No.1 Provincial People's Hospital, Henan Institute of Hematology Cancer Hospital of Henan, Huashan Hospital, Jiangsu Institute of Hematology, The First Affiliated Hospital of Soochow University, Jiangsu Province Hospital, The First Affiliated Hospital of Nanjing Medical University, Nanjing Drum Tower Hospital, Peking University First Hospital, Peking University People's Hospital, Shanghai Changzheng Hospital, Shanghai Children's Medical Center, Shanghai Daopei Hospital, Shanghai Ruijin Hospital, The Third Affiliated Hospital of Sun Yat-sen University, Tongren Hospital, Union Hospital Fujian Medical University, Union Hospital, Tongji Medical College of Huazhong University of Science and Technology, West China Hospital of Sichuan University, Xinhua Hospital Affiliated to Shanghai Jiaotong University School of Medicine, Xuanwu Hospital Capital Medical University, Beijing Friendship Hospital, Zhongshan Hospital of Xiamen University, Zhujiang Hospital Southern Medical University, Chinese PLA General Hospital, Harbin

Hematology and Cancer Institution, Nanfang Hospital Southern Medical University, PLA Navy General Hospital, PLA, The Military General Hospital of Beijing, Tangshan Iron and Steel Company Hospital, The First Affiliated Hospital of Guangxi Medical University, The Second Affiliated Hospital of Henan Medical University, Xinqiao Hospital of the Third Military Medical University, 309th Hospital of PLA, Changhai Hospital of Shanghai, Xinjiang Uygur Autonomous Region People's Hospital, Zhejiang Provincial Hospital of Traditional Chinese Medicine, The First Affiliated Hospital of Medical College of Xi'an Jiao Tong University, Shandong Provincial Hospital, Hospital of Guizhou Medical University, Guangdong General Hospital, Xiangya Hospital Central-South University, The First Hospital of China Medical University, 307 Hospital of PLA, Anhui Provincial Hospital, Shangdong Provincial Qianfoshan Hospital, Chinese Academy of Medical Sciences (CAMS) and Peking Union Medical College (PUMC), Hainan General Hospital, Kunming General Hospital of PLA, Ludaopei Hematology and Oncology Center, Ningbo First Hospital, Peking University Third Hospital, Qilu Hospital of Shandong University, Shangdong Provincial Qianfoshan Hospital, The Affiliated Hospital of Qingdao University, The First Affiliated Hospital of Fujian Medical University, The Second Artillery General Hospital of Chinese PLA, The Second Hospital of Hebei Medical University, Tianjin First Central Hospital, Tianjin Medical University Cancer Institute and Hospital, West China Women's and Children's Hospital, Xijing Hospital, He Nan Provincial People's Hospital, Fujian Provincial Hospital, Shengjing Hospital of China Medical University, Sun Yat-sen Memorial Hospital, Sun Yat-sen University, The First Affiliated Hospital of Dalian Medical University, Yanda International Hospital, Jinan Military General Hospital, The First Affiliated Hospital of He Nan Science and Technology University, The General Hospital of Shenyang Military, Tongji Hospital Huazhong University of Science and Technology, Anhui Provincial Hospital, Nanfang Hospital Southern Medical University (Nan Fang Hospital (Adults)), Changhai Hospital of PLA, Xiehe Hospital of Beijing, The First Affiliated Hospital of Xinjiang Medical Collage, The First Hospital of Shanghai, The First Affiliated Hospital of Suzhou University, Hematology Department of 307 Hospital of Hematology Department of PLA, Zhejiang Provincial Hospital of Traditional Chinese Medicine, The First Affiliated Hospital of Wenzhou (Medical) University, Ruijin Hospital

### ***Hong Kong***

Queen Mary Hospital-The University of Hong Kong, Prince of Wales Hospital-The Chinese University of Hong Kong

### ***India***

Christian Medical College, Army Research and Referral Hospital, Tata Memorial Centre, All India Institute of Medical Science, Sahyadri Specialty Hospital, Jaslok Hospital and Research Center, Narayana Multi specialty Hospital and Mazumdar Shaw Cancer Center, Gujarat Cancer and Research Institute, Rajiv Gandhi Cancer Institute and Research Center, Postgraduate Institute of Medical Education and Research, Manipal Hospital, Prince Aly Khan Hospital, Ruby Hall Clinic, Sir Ganga Ram Hospital, Christian Medical College, Apollo Cancer Specialty Hospital, Deenanath Mangeshkar Hospital, BLK Super Specialty Hospital, Institute Rotary Cancer Hospital, Sanjay Gandhi Post Graduate Institute of Medical Sciences, Apollo CBCC Cancer Care, Health Care Global Enterprises, Nil Ratan Sircar Medical College and Hospital, Columbia Asia Referral Hospital, Institute of

Haematology and Transfusion Medicine, Cancer Institute (WIA), Sterling Cancer Hospital, Tata Medical Center, Kovai Medical College and Hospital, Lotus Hospital, Central India Institute of Haematology and Oncology, Global Hospital and Transplant Center, Max Super Specialty Hospital, Amrita Institute of Medical Sciences and Research Centre, Malabar Cancer Centre, Fortis Memorial Research Institute, Artemis Hospital, Saroj Gupta Cancer Centre and Research Institute, Indraprastha Apollo Hospitals, M S Ramaiah Medical College, Yashoda Hospital, Dharamshila Cancer Hospital and Research Center, Meenakshi Mission Hospital, Apollo Gleneagles Hospital, Max Super Specialty Hospital Shalimar Bagh, Command Hospital Air Force, Armed Forces Medical College and Command Hospital, LTM Medical College, Kokilaben Dhirubhai Ambani Hospital, Sahara Hospital, Manipal Hospital, Medanta-The Medicity Hospital, AMRI Hospital, Gleneagles Global Health City Chennai, Kamalnayan Bajaj Hospital, Sher-i-Kashmir Institute of Medical Sciences, Jawaharlal Institute of Postgraduate Medical Education and Research, Aster Aadhar Hospital, Aster Medcity Hospital, Asian Institute of Medical Sciences, Shri Siddhivinayak Ganpati Cancer Hospital, Rajagiri Hospital, Nanavati Super Speciality Hospital, Bangalore Baptist Hospital, CHL Hospitals, Max Super Speciality Hospital SAKET

### ***Iran***

Shariati Hospital, Namizi Hospital Transplant Research Center-Shiraz University of Medical Sciences, Imam Khomeini Hospital, Afzalipour Hospital, Imam Khomeini Hospital, Amir Kola Hospital, Petroleum Industry Hospital, Taleghani Hospital, Mahak Hospital, Montaserieh Hospital, Sherkat Naft Hospital, Shafa hospital-Ahvaz

### ***Japan***

Hokkaido University Hospital, Sapporo Hokuyu Hospital, Sapporo Medical University Hospital, Asahikawa Medical College Hospital, Asahikawa Red Cross Hospital, Teine Keijinkai Hospital, Sapporo City General Hospital, National Hospital Organization Hokkaido Cancer Center, Hakodate Municipal Hospital, Asahikawa City Hospital, Hokkaido Medical Center for Child Health and Rehabilitation, Asahikawa-Kosei General Hospital, Steel Memorial Muroran Hospital, Oji General Hospital, Hirosaki University Hospital, Aomori Prefectural Central Hospital, Iwate Medical University School of Medicine, Tohoku University Hospital, National Hospital Organization Sendai Medical Center, Miyagi Cancer Center, Miyagi Children's Hospital, Ishinomaki Red Cross Hospital, Osaki Citizen Hospital, Akita University School of Medicine, Nakadoori General Hospital, Yamagata University School of Medicine, Yamagata Prefectural Central Hospital, Fukushima Medical University School of Medicine, Iwaki Kyoritsu General Hospital, Ohta General Hospital, Ohta Nishinouchi Hospital, Kita-Fukushima Medical Center, University of Tsukuba, Tsukuba University Hospital, Ibaraki Children's Hospital, Tsukuba Memorial Hospital, Tsuchiura Kyodo General Hospital, Hitachi General Hospital, National Hospital Organization Mito Medical Center, KKR Suifu Hospital, Jichi Medical University Hospital, Dokkyo Medical University School of Medicine, Tochigi Cancer Center, Saiseikai Maebashi Hospital, Gunma University Graduate School of Medicine, Gunma Children's Medical Center, National Hospital Organization Nishigunma National Hospital, Gunma Prefectural Cancer Center, Saitama Prefectural Cancer Center, Saitama Medical University International Medical Center, National Defense Medical College, Saitama Children's Medical Center, Saitama

Medical Center-Saitama Medical University, Saitama Medical Center, Jichi Medical University, Comprehensive Cancer Center-International Medical Center-Saitama Medical University, Chiba University Hospital, Chiba Children's Hospital, Matsudo City Hospital, Kameda General Hospital, Jikei University-Kashiwa Hospital, Chiba Aoba Municipal Hospital, Japanese Red Cross Narita Hospital, National Cancer Center Hospital East, Teikyo University Chiba Medical Center, Juntendo University Urayasu Hospital, Nippon Medical School Chiba Hokusoh Hospital, National Cancer Center Hospital, The Institute of Medical Science-The University of Tokyo, Tokyo Metropolitan Cancer and Infectious Disease Center-Komagome Hospital, Nihon University of School of Medicine Itabashi Hospital, The Jikei University School of Medicine, Keio University School of Medicine, Tokyo Medical University Hospital, Tokyo Women's Medical University, Showa University School of Medicine, Kyorin University School of Medicine, NTT Kanto Medical Center, University of Tokyo Hospital, Juntendo University School of Medicine, Nippon Medical School, Teikyo University School of Medicine, Tokyo Metropolitan Kiyose Children's Hospital, Toho University Omori Medical Center, St. Luke's International Hospital, National Center for Child, Health and Development, Toranomon Hospital, International Medical Center of Japan, Faculty of Medicine Hospital Tokyo Medical and Dental University, National Hospital Organization, Tokyo Medical Center, Tokyo Metropolitan Fuchu Hospital, Japanese Red Cross Medical Center, Saiseikai Central Hospital, Tokyo Metropolitan Geriatric Hospital, Yokohama City University Hospital, Kanagawa Cancer Center, St. Marianna University School of Medicine, Tokai University School of Medicine, Kanagawa Children's Medical Center, Yokohama City University Medical Center, Showa University Fujigaoka Hospital, St. Marianna University School of Medicine Yokohama City Seibu Hospital, Yokohama Municipal Citizen's Hospital, Yokohama City Minato Red Cross Hospital, Federation of National Public Service Personnel Mutual Aid Associations, Toranomon Hospital, Kajigaya, Yokohama Minami Kyosai Hospital, Niigata University Medical and Dental Hospital, Niigata Cancer Center, Nagaoka Red Cross Hospital, Toyama Prefectural Central Hospital, Kurobe City Hospital, Toyama University Hospital, Kouseiren Takaoka Hospital, Toyama Red Cross Hospital, Kanazawa University Hospital, Kanazawa Medical University Hospital, Ishikawa Prefectural Central Hospital, University of Fukui Hospital, University of Yamanashi-Faculty of Medicine, Yamanashi Prefectural Central Hospital, Shinshu University School of Medicine, Nagano Children's Hospital, Nagano Red Cross Hospital, Gifu University Graduate School of Medicine, Gifu Municipal Hospital, Gifu Red Cross Hospital, Hamamatsu University School of Medicine, Hamamatsu Medical Center, Shizuoka General Hospital, Seirei Hamamatsu General Hospital, Shizuoka Children's Hospital, Shizuoka Red Cross Hospital, Shizuoka Saiseikai General Hospital, Shizuoka Cancer Center, Juntendo University Shizuoka Hospital, Shizuoka City Shimizu Hospital, Japanese Red Cross Nagoya First Hospital, Nagoya Daini Red Cross Hospital, Meitetsu Hospital, Nagoya University Graduate school of Medicine, Nagoya Ekisaikai Hospital, National Hospital Organization-Nagoya Medical Center, Nagoya City University Hospital, Anjo Kosei Hospital, Konan Kosei Hospital, Fujita Health University School of Medicine, Aichi Cancer Center Hospital, Toyohashi Municipal Hospital, Aichi Medical University School of Medicine, Social Insurance Chukyo Hospital, Nagoya Memorial Hospital, Toyota Memorial Hospital, Toyota Kosei Hospital, Nishio Municipal Hospital, Mie University Hospital, Yamada Red Cross Hospital, Suzuka Kaisei Hospital, Suzuka General Hospital, Shiga University of Medical Science, Shiga Medical Center for Children, Otsu Red Cross Hospital, Omihachiman Community Medical Center, Kyoto University Hospital, Kyoto First Red Cross Hospital,

Kyoto Prefectural University of Medicine, Social Insurance Kyoto Hospital, Kyoto City Hospital, Aiseikai Yamashina Hospital, Kyoto Katsura Hospital, Kyoto Second Red Cross Hospital, Osaka Medical Center For Cancer And Cardiovascular Diseases, Kinki University School of Medicine, Osaka University Hospital, Osaka City University Graduate School of Medicine, National Hospital Organization Osaka National Hospital, Children's Medical Center-Osaka City General Hospital, Osaka Red Cross Hospital, Osaka Medical Center and Research Institute for Material and Child Health, Matsushita Memorial Hospital, Kishiwada City Hospital, Rinku General Medical Center Izumisano Municipal Hospital, Osaka Medical College Hospital, Fuchu Hospital, Kansai Medical University Hirakata Hospital, Sakai Hospital, Kinki University School of Medicine, Sumitomo Hospital, The Tazuke Kofukai Medical Research Institute Kitano Hospital, Nissay Hospital, Takatsuki Red Cross Hospital, Yodogawa Christian Hospital, KKR Otemae Hospital, PL General Hospital, Hyogo College of Medicine, Hyogo Children's Hospital, Hyogo Cancer Center, Kobe City Medical Center General Hospital, Kobe University Hospital, Ashiya Municipal Hospital, Akashi Municipal Hospital, Kobe Central Hospital of Insurance, Hyogo Prefectural Nishinomiya Hospital, Shinko Hospital, Meiwa Hospital, Nara Medical University, Tenri Hospital, Takanohara Central Hospital, Kinki Daigaku Igakubu Nara Hospital, Wakayama Medical University, Japanese Red Cross Society Wakayama Medical Center, Insurance Social Kinan Hospital, Tottori Prefectural Central Hospital, Tottori University Faculty of Medicine, National Hospital Organization, Yonago Medical Center, Shimane Prefectural Central Hospital, Shimane University Faculty of Medicine, Matusue Red Cross Hospital, National Hospital Organization Okayama Medical Center, Kurashiki Central Hospital, Okayama University Hospital, Kawasaki Medical School, Okayama Rosai Hospital, National Hospital Organization, Minami-Okayama Medical Center, Okayama Citizens' Hospital, Hiroshima Red Cross Hospital and Atomic-bomb Survivors Hospital, Hiroshima University Hospital, National Hospital Organization Kure Medical Center, Hiroshima-Nishi Medical Center, Cyugoku Central Hospital, Yamaguchi University School of Medicine, Shimonoseki Kosei General Hospital, Tokushima University Hospital, Tokushima Red Cross Hospital, Kagawa University Faculty of Medicine, Kagawa National Children's Hospital, Takamatsu Red Cross Hospital, Kagawa Prefectural Central Hospital, Ehime Prefectural Central Hospital, Matsuyama Red Cross Hospital, National Hospital Organization, Shikoku Cancer Center, Ehime University Graduate School of Medicine, Kochi Medical School-Kochi University, Kochi Health Sciences Center, Kyushu University Hospital, Harasanshin Hospital, Hamanomachi Hospital, Our Lady of the Snow Social Medical Corporation St. Mary's Hospital, Kokura Memorial Hospital, Kurume University School of Medicine, Fukuoka University School of Medicine, National Kyushu Cancer Center, University of Occupational and Environmental Health-Japan, National Hospital Organization Kyusyu Medical Center, Kitakyusyu Municipal Medical Center, Kyushu Kosei-nenkin Hospital, Iizuka Hospital, Saga-Ken Medical Centre Koseikan, Saga University Hospital, Nagasaki University Graduate School of Biomedical Sciences, Japanese Red Cross Nagasaki Genbaku Hospital, Sasebo City General Hospital, National Hospital Organization-Nagasaki Medical Center, National Hospital Organization-Kumamoto Medical Center, Kumamoto University School of Medicine, Oita University Faculty of Medicine, Oita Prefectural Hospital, Oita Kouseiren Tsurumi Hospital, Kyusyu University Hospital at Beppu, Miyazaki Prefectural Miyazaki Hospital, University of Miyazaki Hospital, Imamura Bun-in Hospital, Kagoshima University Medical and Dental Hospital, Kagoshima City Hospital, National Hospital Organization Kagoshima Medical Center, University of the Ryukyus Faculty of

Medicine, Okinawa Prefectural Nanbu Medical Center and Children's Medical Center, Heart Life Hospital, Okinawa Red Cross Hospital.

### ***Korea***

The Catholic University Seoul St. Mary's Hospital, The Catholic University Daejeon St. Mary's Hospital, The Catholic University Our Lady Mercy Hospital, The Catholic University St. Vincent's Hospital, Gachon University Gil Hospital, Kyungpook National University Hospital, Gyeongsan National University Hospital, Kyung Hee University Hospital, Korea University Guro Hospital, Korea University Anam Hospital, Kosin University Gospel Hospital, National Cancer Center, Daegu Catholic University Hospital, Daegu Fatima Hospital, Dong-A University Hospital, Pusan National University Hospital, Seoul National University Hospital, Sungkyunkwan University Hospital, Soonchunhyang University Bucheon Hospital, Soonchunhyang University Seoul Hospital, Ajou University Hospital, Yonsei University Hospital, Yeungnam University Hospital, Ulsan University Asan Medical Center, Ulsan University Hospital, Wonkwang University Hospital, Korea Cancer Center Hospital, Ewha Womans University Mokdong Hospital, Inje University Paik Hospital, Inha University Hospital, Chonnam National University Hwasun Hospital, Chonbuk National University Hospital, Chungnam National University Hospital, Pochon University Bundang CHA Hospital, Hallym University Hospital, Hanyang University Hospital, Chosun University Hospital, Chung-Ang University Hospital, Inje University Haeundae Paik Hospital, Cheju Halla General Hospital, Keimyung University Dongsan Medical Center, Konkuk University Medical Center, Pusan National University Yangsan Hospital, Yonsei University Wonju Christian Hospital

### ***Malaysia***

Hospital Ampang, Hospital Kuala Lumpur, Gleneagles Medical Centre Penang, Lam Wah Ee Hospital, Subang Jaya Medical Centre, Hospital Universiti Kebangsaan Malaysia, University Malaya Medical Centre, Ampang Puteri Specialist Hospital, Hospital Universiti Sains Malaysia, Hospital Pulau Pinang, Hospital Melaka, Hospital Wanita dan Kanak-Kanak, Hospital Sultanah Aminah, Sunway Medical Centre, National University hospital Medical Centre

### ***Mongolia***

National First Central Hospital of Mongolia

### ***Myanmar***

North Okkalapa General and Teaching Hospital, Yangon General Hospital

### ***Nepal***

Civil Service Hospital

### ***New Zealand***

Auckland Hospital, Christchurch Hospital, Palmerston North Hospital, Starship Hospital, Waikato Hospital, Wellington Hospital

***Pakistan***

National Institute of Blood Diseases and Blood and Marrow Transplantation, The Aga Khan University Hospital, Armed Forces Bone Marrow Transplant Centre

***The Philippines***

St. Luke's Medical Center–Quezon City, St. Luke's Medical Center–Global City, The Medical city, kati Medical center

***Singapore***

National University Hospital, Singapore General Hospital, KK Hospital Women's and Children's Hospital, National Cancer Center Singapore

***Sri Lanka***

The Central Hospital, National Cancer Institute

***Taiwan***

Taipei Veterans General Hospital, National Taiwan University Hospital, National Taiwan University Hospital, Kaoshiung Medical University Hospital, China Medical University Hospital, Chang-Gung Memorial Hospital-Linko, Tri Service General Hospital, Hualien Tzu Chi Hospital-Buddhist Tzu Chi Medical Foundation, Chang-Gung Memorial Hospital-Chiayi, Chia-Yi Christian Hospital, National Cheng Kung University Hospital, Kaoshiung Veterans General Hospital, Chang-Gung Memorial Hospital-Kaohsiung, Far Eastern Memorial Hospital

***Thailand***

Faculty of Medicine Ramathibodi Hospital, King Chulalongkorn Memorial Hospital, Phramongkutklo Hospital, Faculty of Medicine Siriraj Hospital, Naresuan University, Srinagarind Hospital-Khon Kaen University, Chiang Mai University, Sunpasitthiprasong Hospital

***Vietnam***

Blood Transfusion and Hematology Hospital, National Institute of Blood Transfusion and Hematology
